# Supplementary material for: City-scale accessibility of emergency responders operating during flood events
Source: Copernicus journal article supplement (doi:10.5194/nhess-17-1-2017), 2017-01-03
Supplement: Supplementary file 1 [file nhess-17-1-2017-supplement.zip]

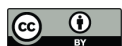

## *Supplement of*

# **City-scale accessibility of emergency responders operating during flood events**

**Daniel Green et al.**

*Correspondence to:* Daniel Green (d.green@lboro.ac.uk)

- nhess-17-1-2017-supplement-title-page.pdf
- Figure 14 Animation.wmv

The copyright of individual parts of the supplement might differ from the CC-BY 3.0 licence.
