# Supplementary material for: City-scale accessibility of emergency responders operating during flood events
Source: Copernicus journal article supplement (doi:10.5194/nhess-17-1-2017), 2017-01-03
Supplement: Supplementary file 2 [file nhess-17-1-2017-supplement.zip]

Archive with 2 entries (2 files):
- Figure 14 Animation.wmv
- nhess-17-1-2017-supplement-title-page.pdf
